# Supplementary material for: Continuous Long-Term Exposure to Low Concentrations of MWCNTs Induces an Epithelial-Mesenchymal Transition in BEAS-2B Cells
Source: Nanomaterials (Basel). 2021 Jul 1;11(7):1742. doi: 10.3390/nano11071742 (PMC8308165; doi:10.3390/nano11071742)
Supplement: Supplementary file 1 [file nanomaterials-11-01742-s001.zip › nanomaterials-1262795-supplementary.pdf]

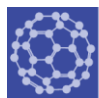

Article

# Continuous Long-Term Exposure to Low Concentrations of MWCNTs Induces an Epithelial-Mesenchymal Transition in BEAS-2B Cells

## Supplementary data

Hélène Barthel <sup>1,2</sup>, Christian Darne <sup>1</sup>, Laurent Gaté <sup>1</sup>, Athanase Visvikis <sup>2</sup> and Carole Seidel <sup>1,\*</sup>

<sup>1</sup> Institut National de Recherche et de Sécurité, CEDEX F-54519 Vandœuvre-lès-Nancy, France; helene.barthel@inrs.fr (H.B.); christian.darne@inrs.fr (C.D.); laurent.gate@inrs.fr (L.G.)

<sup>2</sup> Ingénierie Moléculaire et Physiopathologie Articulaire (IMoPA), Biopôle, Campus Biologie Santé, UMR 7365 CNRS-Université de Lorraine, Vandœuvre-lès-Nancy, France; athanase.visvikis@univ-lorraine.fr

\* Correspondence: carole.seidel@inrs.fr

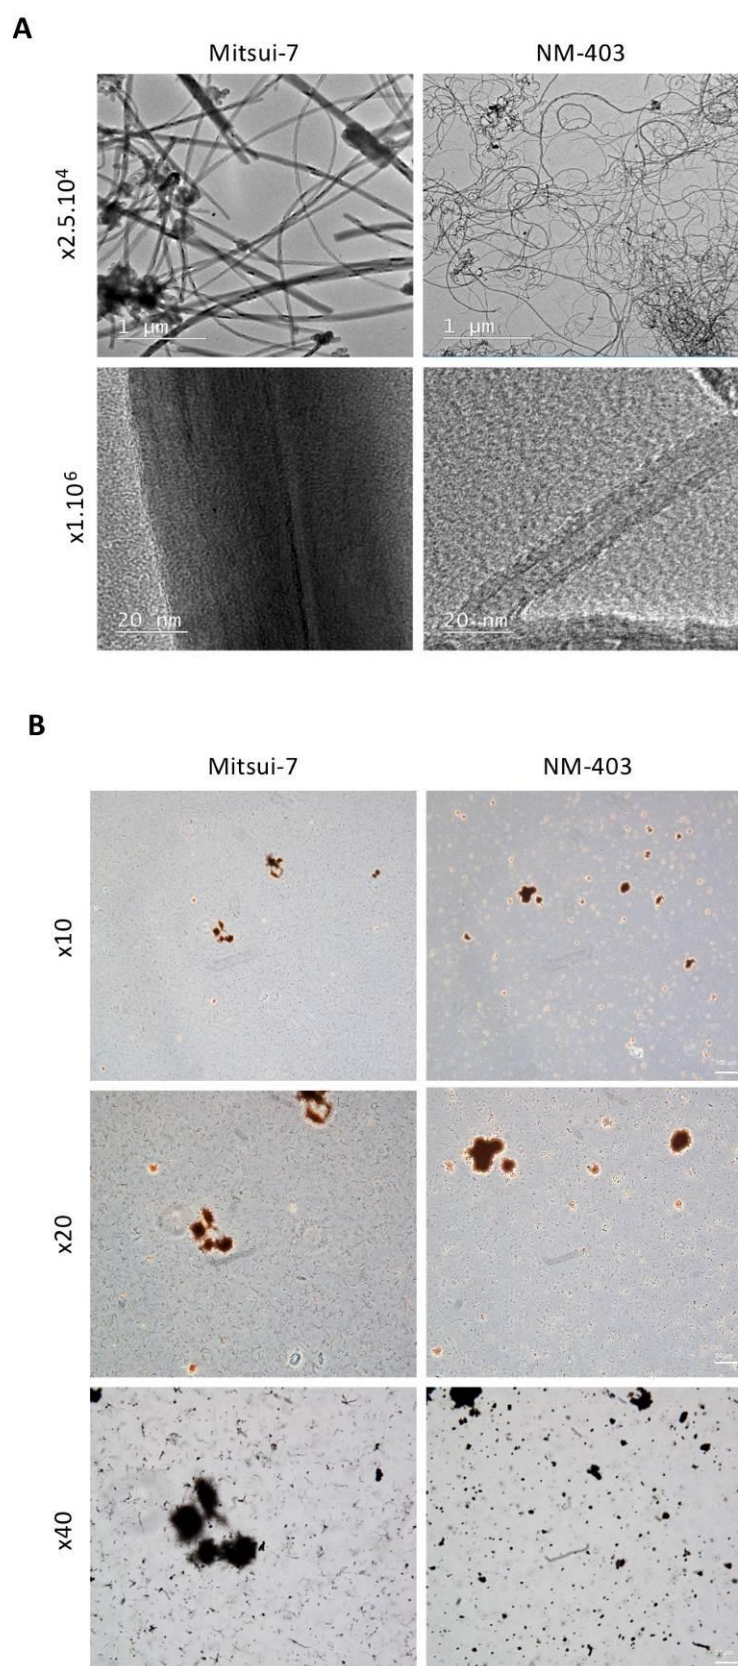

**Supplementary figure 1: Images of MWCNTs and suspensions.** (A) Transmission electronic microscopy images of Mitsui-7 and NM-403 powder. (B) Phase-contrast images of MWCNT suspensions in BSA 1%-LHC-9 medium after 15 min of sonication.

**Supplementary table 1: Concentrations of MWCNTs for BEAS-2B treatments.** The cells were cultured in a T75 flask in a final volume of 15 mL.

| Concentration ( $\mu\text{g}/\text{cm}^2$ ) | Concentration ( $\mu\text{g}/\text{mL}$ ) |
|---------------------------------------------|-------------------------------------------|
| 0.125                                       | 0.625                                     |
| 0.25                                        | 1.25                                      |
| 0.5                                         | 2.5                                       |
| 1                                           | 5                                         |

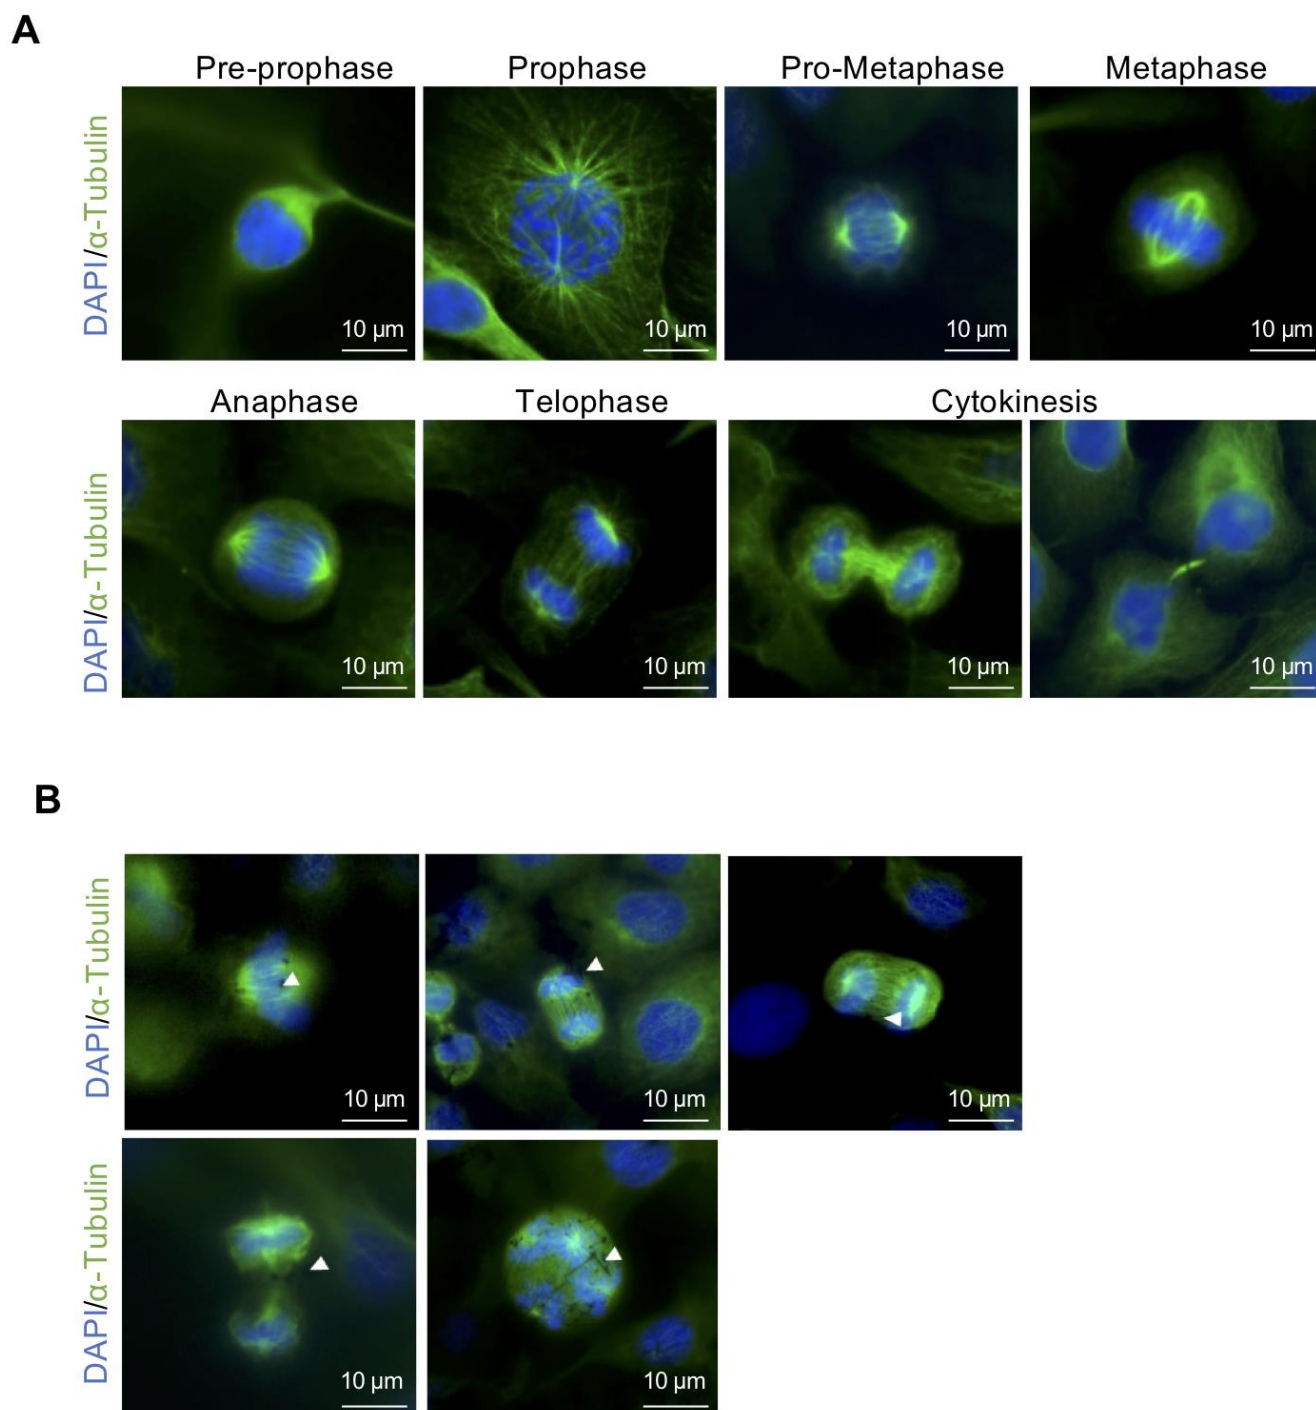

**Supplementary figure 2: Normal and abnormal mitoses of BEAS-2B cells.** The cells were immunolabelled with  $\alpha$ -tubulin-FITC and nuclei stained with DAPI. (A) Images of cells in the different mitosis phases. (B) Following cell treatment by Mitsui-7 or NM-403, carbon nanotubes are visible close to the mitotic spindle and/or nucleus during cell division.

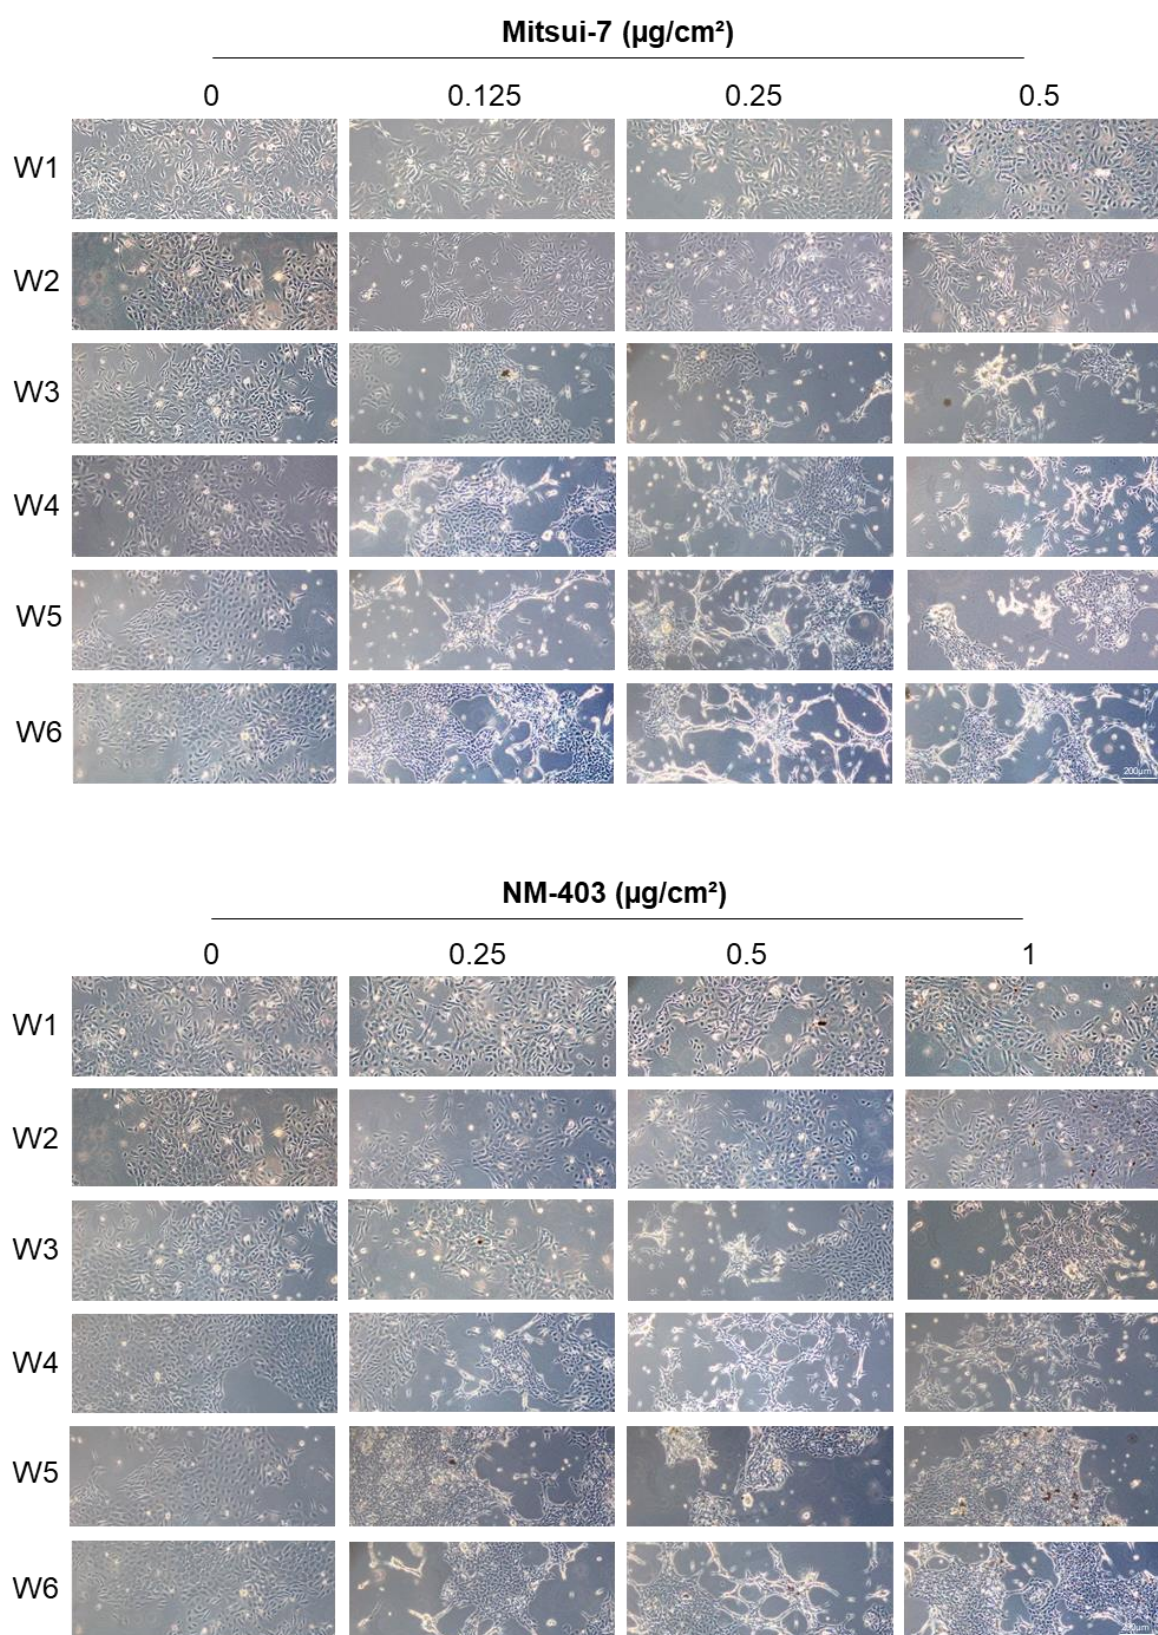

**Supplementary figure 3: Mitsui-7 and NM-403 treatment induced changes in BEAS-2B cell morphology.** After treatment by the indicated concentration of Mitsui-7 and NM-403, phase-contrast microscopy images were recorded weekly from the 1<sup>st</sup> (W1) to the 6<sup>th</sup> (W6) week.

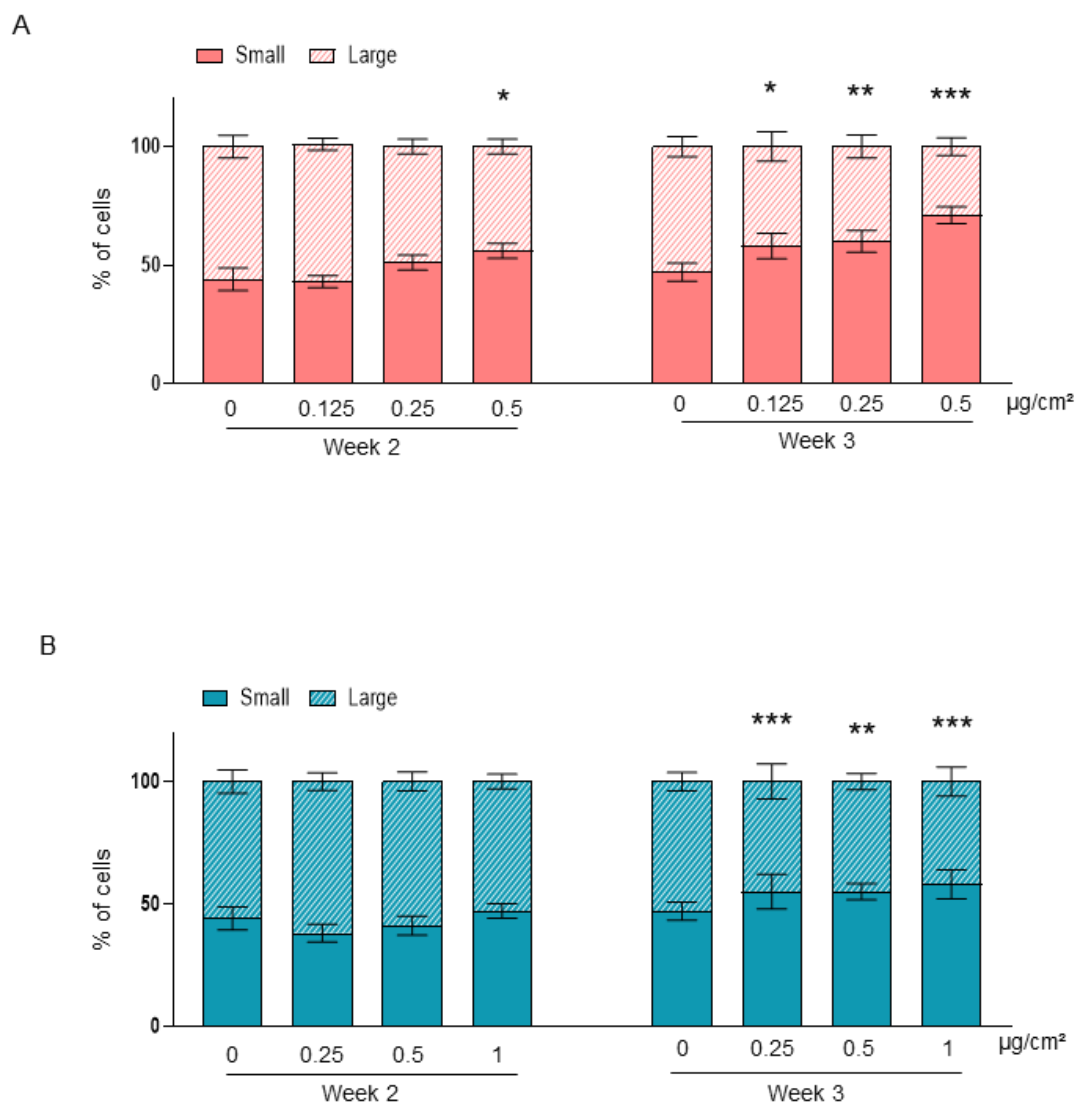

**Supplementary figure 4: Cell population after 2 and 3 weeks of treatment with Mitsui-7 and NM-403.** The cells were treated with vehicle, (A) Mitsui-7 (0.125, 0.25 and 0.5 µg/cm<sup>2</sup>) or (B) NM-403 (0.25, 0.5 and 1 µg/cm<sup>2</sup>) for 2 and 3 weeks and their size and granulometry were analyzed by flow cytometry. Based on SSC:FSC profiles, 2 cell populations were discriminated: with small size and low granulometry (small) or with large size and high granulometry (large). The histograms represents the mean  $\pm$  standard error of the mean (SEM) of the quantification of the two cell populations of three independent experiments. \*  $p < 0.05$ , \*\*  $p < 0.01$ , \*\*\*  $p < 0.001$  significantly different from the control.

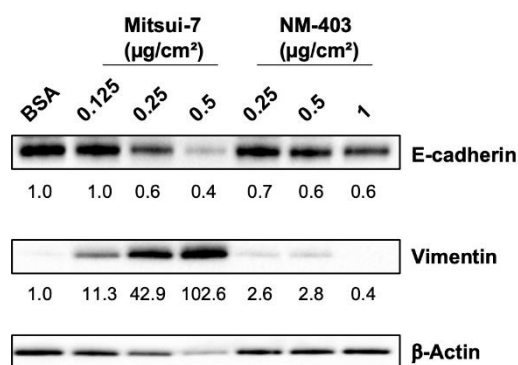

**Supplementary figure 5: E-cadherin and Vimentin protein level after 6 weeks of treatment with Mitsui-7 and NM-403.** Total proteins were extracted from cells treated 6 weeks at the indicated concentrations of Mitsui-7 and NM-403. E-cadherin and Vimentin protein level were analyzed by Western Blot. Quantifications are presented under protein of interest (Protein of interest/Loading control) reported to the vehicle control. Blots are representative of two independent experiments.

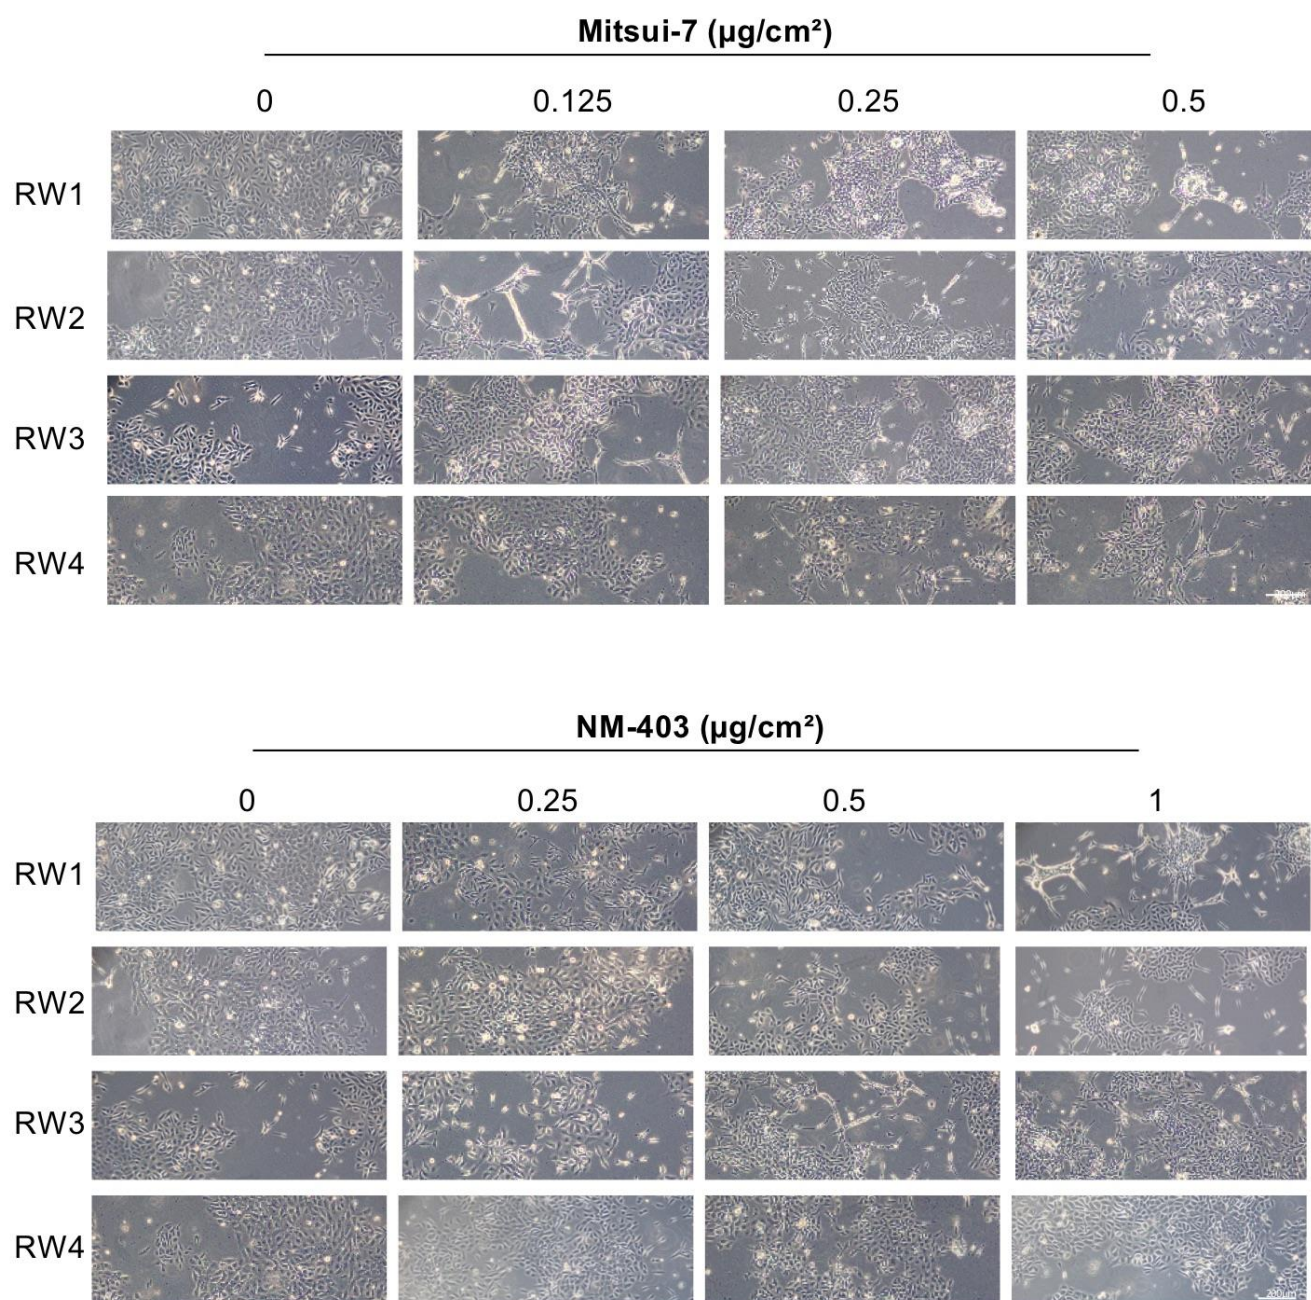

**Supplementary figure 6: Mitsui-7 and NM-403 treatment induced changes in BEAS-2B cell morphology.** Phase-contrast microscopy images were recorded weekly in the recovery period, from the 1<sup>st</sup> to 4<sup>th</sup> week (RW1 to RW4).

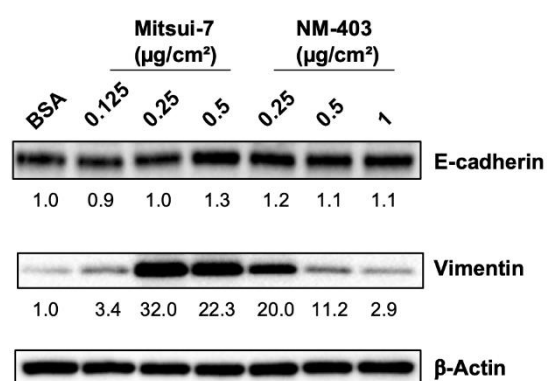

**Supplementary figure 7: E-cadherin and Vimentin protein level after 4 weeks of the recovery period.** Total proteins were extracted from cells 4 weeks after the recovery period. E-cadherin and Vimentin protein level were analyzed by Western Blot. Quantifications are presented under protein of interest (Protein of interest/Loading control) reported to the vehicle control. Blots are representative of at least two independent experiments.
